# Supplementary material for: Error-prone nonhomologous end joining repair operates in human pluripotent stem cells during late G2
Source: publisher site journal article supplement (doi:10.18632/aging.100336), 2011-06-12
Supplement: Supplementary file [file aging-v3i6-100336-supplementary-material-SD1.pdf]

39. Lagarkova MA, Ereemeev AV, Svetlakov AV, Rubtsov NB, Kiselev SL. Human embryonic stem cell lines isolation, cultivation, and characterization. *In Vitro Cell Dev Biol Anim.* 2010; 46: 284-93.

40. Prokhorovich MA, Lagar'kova MA, Shilov AG, Karamysheva TV, Kiselyov SL, Rubtsov NB. Cultures of hESM human embryonic stem cells: chromosomal aberrations and karyotype stability. *Bull Exp Biol Med.* 2007; 144: 126-129.

## SUPPLEMENTARY MATERIALS

**Supplementary Table S1.** Immunohistochemical features of pluripotent stem cells hESM01, hESKM05, iPS12, isogenic fibroblast-like derivatives of hESCs, and HUVEC cells parental for iPS12. Markers of pluripotency are shown in bold, fibroblast markers – in italic.

| Marker                      | hESM01 | hESKM05 | iPS12 | hESM01f | hESKM05f | HUVEC |
|-----------------------------|--------|---------|-------|---------|----------|-------|
| <i>prolyl-4-hydroxylase</i> | -      | -       | -     | +       | +        | +     |
| <i>CD90</i>                 | +      | +       | +     | +       | +        |       |
| <i>CD105</i>                | -      | -       | -     | +       | +        | +     |
| vWF                         | -      | -       | -     | -       | -        | +     |
| CD31                        | -      | -       | -     | -       | -        | +     |
| CD30                        | +      | +       | +     | -       | -        | -     |
| CD44                        | -      | -       | -     | +       | +        | +     |
| Vimentin                    | +/-    | +/-     | +/-   | +       | +        | +     |
| Pan-cytokeratin             | +      | +       | +     | -       | -        | -     |
| GFAP                        | -      | -       | -     | -       | -        | -     |
| <b>OCT4</b>                 | +      | +       | +     | -       | -        | -     |
| <b>NANOG</b>                | +      | +       | +     | -       | -        | -     |
| <b>SSEA-4</b>               | +      | +       | +     | -       | -        | -     |
| <b>SSEA-3</b>               | +      | +       | +     | -       | -        | -     |
| <b>Tra-1-60</b>             | +      | +       | +     | -       | -        |       |

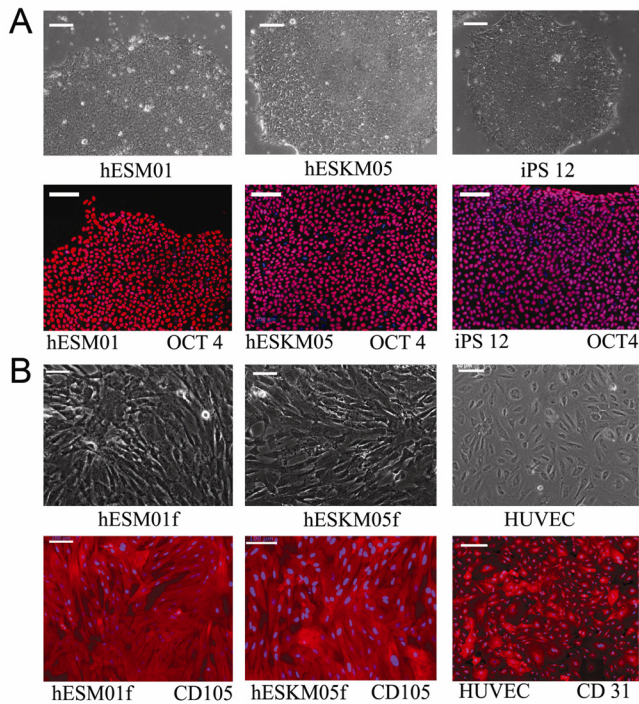

**Supplementary Figure S1. The representative images of cells used in the study.** (A) Images of pluripotent cells hESM01, hESKM05 and iPS12 cells. Upper row: Phase contrast images of cells. Bottom row: Immunofluorescence staining with antibodies to OCT4 (red) Nuclei were counterstained with DAPI (blue); (B) Images of differentiated hESM01f, hESKM05f and HUVEC. Upper row: Phase contrast images of cells. Bottom row: Immunofluorescence staining with antibodies to CD105 or CD31 (red). Nuclei were counterstained with DAPI (blue); Scale bars correspond to 100  $\mu$ m.

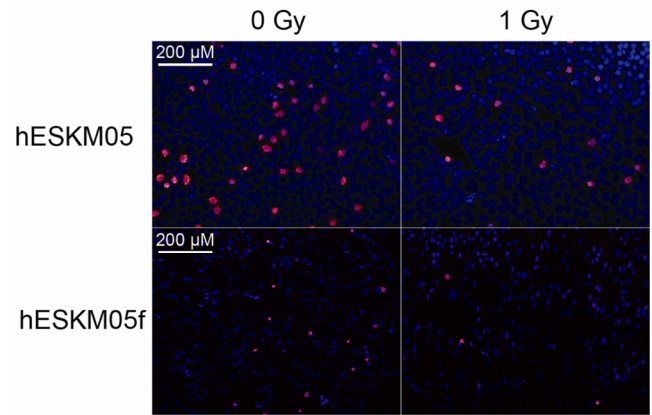

**Supplementary Figure S2. The mitotic index reduced after irradiation at dose of 1 Gy to the same extent in pluripotent and somatic cells.** Immunofluorescence staining with pH3-antibody (red) and DAPI (blue) counterstaining was performed.

**Supplementary Table S2. The spontaneous level of chromatid-type aberration**

| Cell line | Cells scored | The frequency of chromatid-type aberrations per 1 cell, $\pm$ SEM <sup>a</sup> |                  |
|-----------|--------------|--------------------------------------------------------------------------------|------------------|
|           |              | Exchanges                                                                      | Breaks           |
| hESM01    | 350          | 0                                                                              | 0.01 $\pm$ 0.005 |
| hESM01f   | 250          | 0                                                                              | 0.08 $\pm$ 0.02  |
| hESKM05   | 60           | 0                                                                              | 0.05 $\pm$ 0.03  |
| hESKM05f  | 100          | 0                                                                              | 0.04 $\pm$ 0.02  |
| iPS12     | 155          | 0                                                                              | 0.01             |
| HUVEC     | 100          | 0                                                                              | 0.01             |
| HS27      | 50           | 0                                                                              | 0.02             |

<sup>a</sup> - SEM – Poisson's standard error of mean.

**Supplementary Table S3. The results of G2-assay**

| Cell line | Cells scored | The frequency of chromatid-type aberrations per 1 cell, $\pm$ SEM <sup>b</sup> |                  |
|-----------|--------------|--------------------------------------------------------------------------------|------------------|
|           |              | Exchanges                                                                      | Breaks           |
| hESM01    | 117          | 0.79 $\pm$ 0.08                                                                | 2.14 $\pm$ 0.143 |
| hESM01f   | 76           | 0.36 $\pm$ 0.07*                                                               | 2.91 $\pm$ 0.20  |
| hESKM05   | 37           | 0.97 $\pm$ 0.16                                                                | 5.22 $\pm$ 0.38  |
| hESKM05f  | 78           | 0.09 $\pm$ 0.03*                                                               | 5.65 $\pm$ 0.27  |
| iPS12     | 46           | 1.02 $\pm$ 0.15                                                                | 4.33 $\pm$ 0.31  |
| HUVEC     | 106          | 0.28 $\pm$ 0.05*                                                               | 3.96 $\pm$ 0.19  |
| HS27      | 103          | 0.22 $\pm$ 0.05                                                                | 2.62 $\pm$ 0.16  |

\* - yield of aberrations significantly differs from values observed in isogenic pluripotent cells,  $\chi^2$ - test,  $p < 0.0001$

**Supplementary Table S4. Dose response of chromatid-type aberrations**

| Cell line | Dose, Gy | Cells scored | The frequency of chromatid-type aberrations per 1 cell, $\pm$ SEM |                  |
|-----------|----------|--------------|-------------------------------------------------------------------|------------------|
|           |          |              | Exchanges                                                         | Breaks           |
| hESM01    | 0        | 350          | 0                                                                 | 0.01 $\pm$ 0.005 |
|           | 0.25     | 47           | 0.02                                                              | 0.47 $\pm$ 0.10  |
|           | 0.5      | 109          | 0.29 $\pm$ 0.05                                                   | 0.94 $\pm$ 0.09  |
|           | 1        | 87           | 0.86 $\pm$ 0.10                                                   | 1.53 $\pm$ 0.13  |
| hESM01f   | 0        | 251          | 0                                                                 | 0.08 $\pm$ 0.02  |
|           | 0.25     | 96           | 0.02 $\pm$ 0.01                                                   | 0.66 $\pm$ 0.08  |
|           | 0.5      | 84           | 0.15 $\pm$ 0.04                                                   | 1.90 $\pm$ 0.15  |
|           | 1        | 76           | 0.36 $\pm$ 0.07                                                   | 2.91 $\pm$ 0.20  |
| HS27      | 0        | 50           | 0                                                                 | 0.02             |
|           | 0.25     | 50           | 0                                                                 | 0.74 $\pm$ 0.12  |
|           | 0.5      | 50           | 0.04 $\pm$ 0.03                                                   | 1.48 $\pm$ 0.17  |
|           | 1        | 103          | 0.22 $\pm$ 0.12                                                   | 2.62 $\pm$ 0.32  |

**Supplementary Table S5. The effect of NU7026 treatment on non-irradiated cells**

| Cells    | Inhibitor    | Cells scored | The frequency of chromatid-type aberrations per 1 cell, ± SEM |             |
|----------|--------------|--------------|---------------------------------------------------------------|-------------|
|          |              |              | Exchanges                                                     | Breaks      |
| hESKM05  | no inhibitor | 60           | 0                                                             | 0.05 ± 0.03 |
|          | NU7026       | 50           | 0                                                             | 0.02        |
| hESKM05f | no inhibitor | 100          | 0                                                             | 0.04 ± 0.02 |
|          | NU7026       | 50           | 0                                                             | 0.02        |
| HS27     | no inhibitor | 50           | 0                                                             | 0.02        |
|          | NU7026       | 50           | 0                                                             | 0           |

**Supplementary Table S6. The results of G2-assay performed upon NU7026 treatment**

| Cells    | Inhibitor    | Cells scored | The frequency of chromatid-type aberrations per 1 cell, ± SEM |               |
|----------|--------------|--------------|---------------------------------------------------------------|---------------|
|          |              |              | Exchanges                                                     | Breaks        |
| hESKM05  | no inhibitor | 76           | 1.45 ± 0.14                                                   | 4.00 ± 0.23   |
|          | NU7026       | 37           | 0.27 ± 0.09*                                                  | 14.81 ± 0.63* |
| hESKM05f | no inhibitor | 40           | 0.13 ± 0.06                                                   | 4.75 ± 0.34   |
|          | NU7026       | 25           | 0.28 ± 0.11                                                   | 17.48 ± 0.84* |
| HS27     | no inhibitor | 78           | 0.18 ± 0.05                                                   | 2.63 ± 0.18   |
|          | NU7026       | 50           | 0.22 ± 0.07                                                   | 17.12 ± 0.59* |

\* - yield of aberrations significantly differs from values observed in cells non-treated with inhibitors,  $\chi^2$ - test,  $p < 0.0001$
